# Supplementary material for: Environmentally benign enhanced H2 production from abundant copious waste H2S using size tuneable cubic bismuth (Bi0) quantum dots–GeO2 glass photocatalyst under solar light
Source: Royal Society of Chemistry journal article supplement (doi:10.1039/c3gc41940a), 2013-01-01
Supplement: c3gc41940a.pdf [file c3gc41940a.pdf]

## Supplementary Information

### S-1. Repeatability and reusability of photocatalyst.

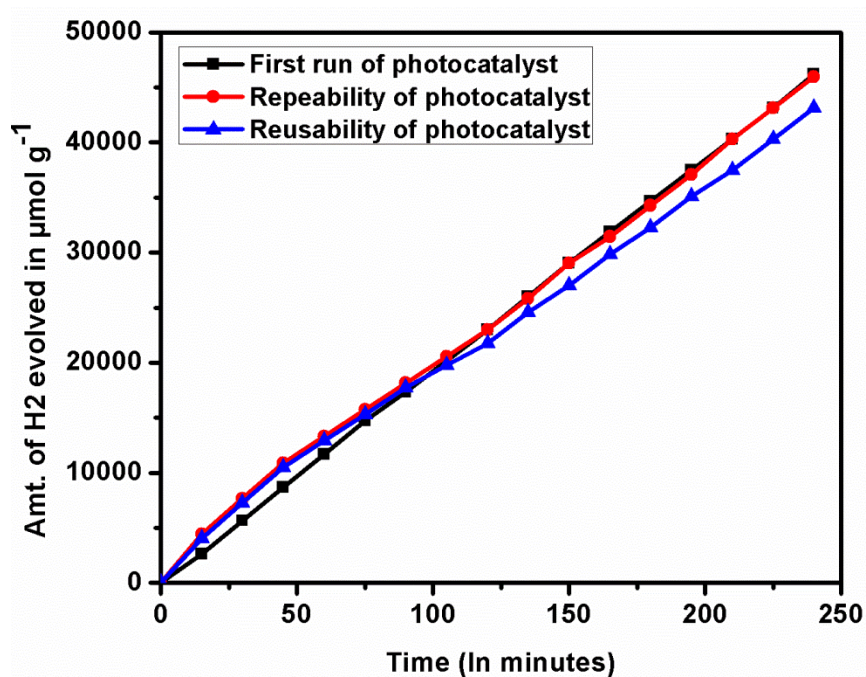

**Figure S-1 .** Photocatalytic activity for hydrogen evolution of Bi doped germanates glass (B03).

| Photocatalyst | Amount of hydrogen evolved in $\mu\text{mol h}^{-1} \text{g}^{-1}$ for <b>first run</b> | Amount of hydrogen evolved in $\mu\text{mol h}^{-1} \text{g}^{-1}$ for <b>second run (for repeatability study)</b> | Amount of hydrogen evolved in $\mu\text{mol h}^{-1} \text{g}^{-1}$ for <b>reused run (For reusability study)</b> |
|---------------|-----------------------------------------------------------------------------------------|--------------------------------------------------------------------------------------------------------------------|------------------------------------------------------------------------------------------------------------------|
| B03           | 11541.22                                                                                | 11490.82                                                                                                           | 10785.24                                                                                                         |

S-2. XRD pattern of reused photocatalysts.

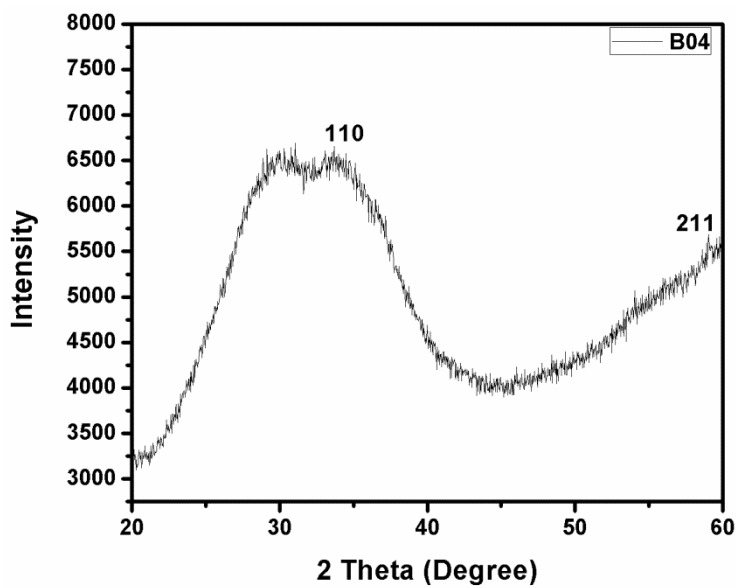

S-3. Raman spectra of reused photocatalysts.

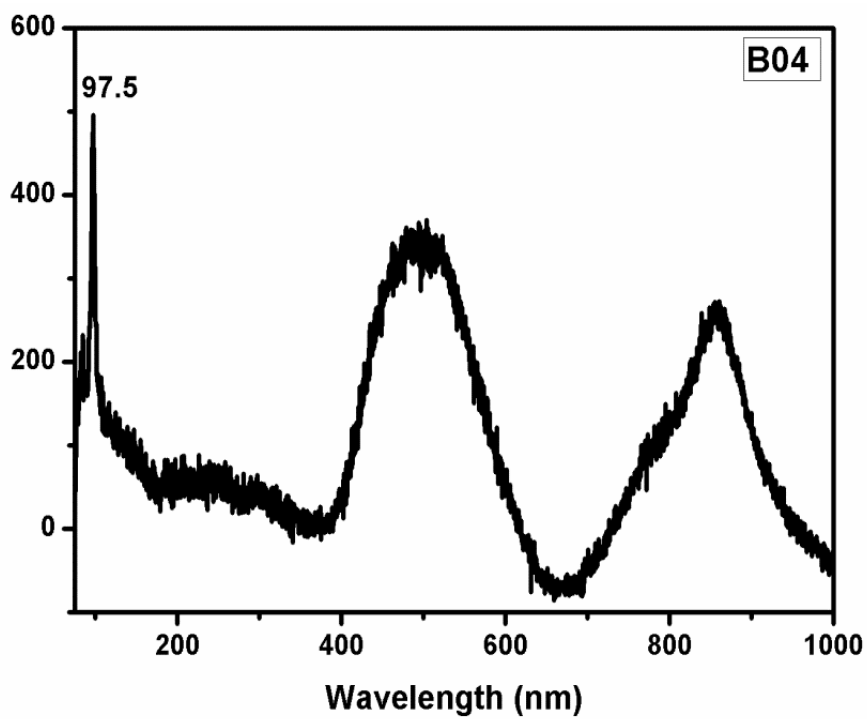

### S-4. Report of analysis of bismuth by Inductive Coupled Plasma (ICP-OES).

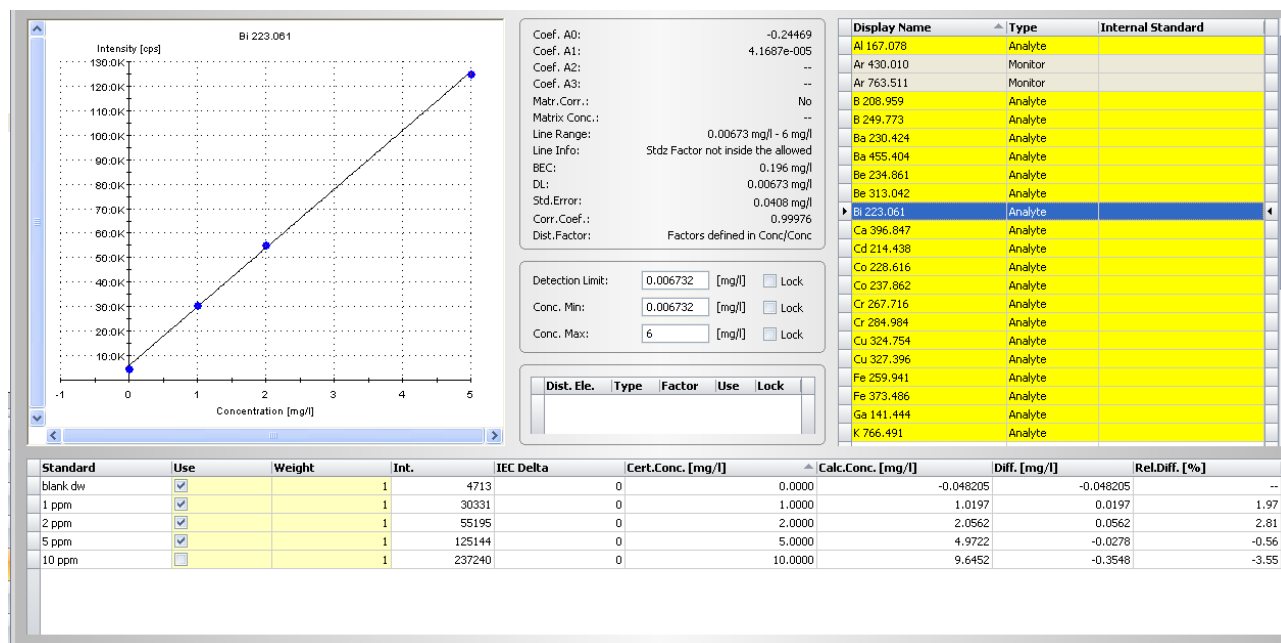

Figure S-4(a): Curve for bismuth in ICP-OES analysis.

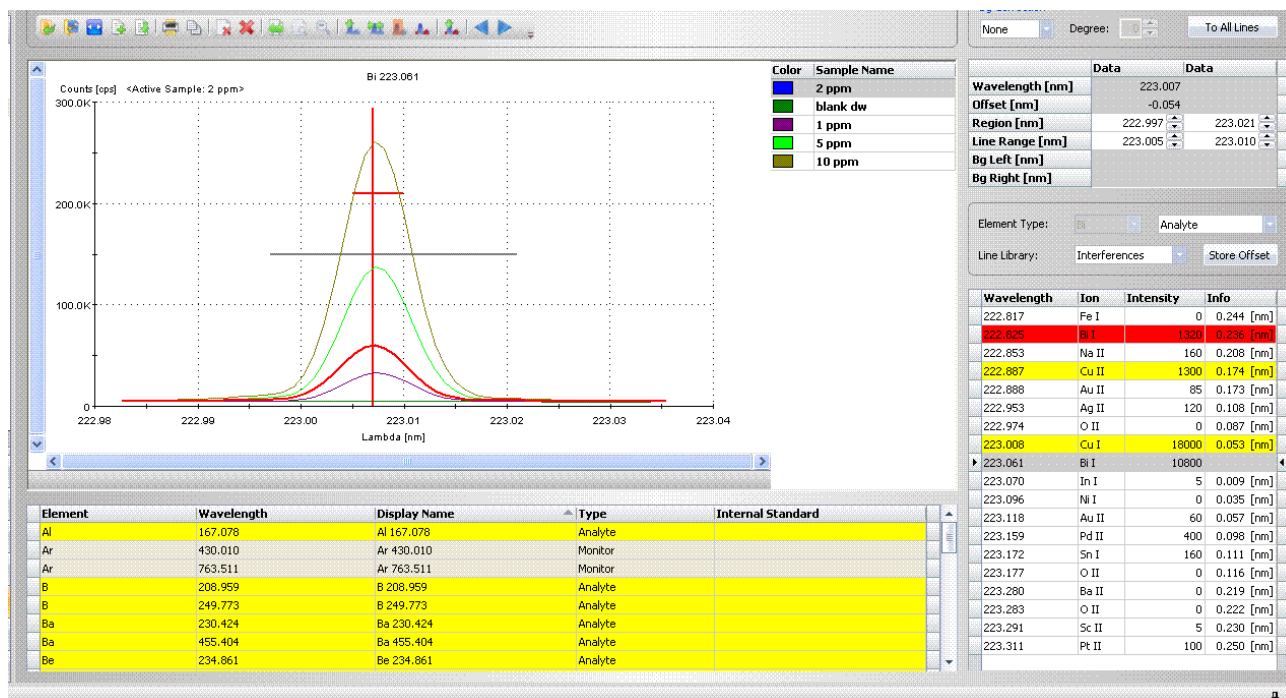

Figure S-4(b): Line definition for bismuth in ICP-OES analysis.

Store Date: 2013-08-21 15:23:12 Recalc Date: Sample Type: Unknown Sample User: Operator Quality: Drifted Method Version: 2011-07-04 14:46:54 Session Id: 2010-10-04 16:11:19 <M>

Sample Name: BIK

| Sample | Type  | Al       | B        | Ba       | Be       | Bi       | Ca       | Cd       | Co       | Cr       | Cu       |
|--------|-------|----------|----------|----------|----------|----------|----------|----------|----------|----------|----------|
|        |       | mg/l     |
| BIW    | rep ! | 1.878    | 5.972    | < -0.030 | < -0.080 | < -0.064 | < -0.038 | < -0.190 | < -0.128 | < -0.104 | < -0.057 |
| BIK    | rep ! | > 18.350 | > 19.716 | < -0.028 | < -0.080 | < -0.086 | < -0.070 | < -0.157 | < -0.118 | < -0.092 | < -0.055 |

  

| Sample | Type  | Li    | Mg       | Mn       | Na        | Ni       | Pb       | Se       | Sr       | Te       | Tl       |
|--------|-------|-------|----------|----------|-----------|----------|----------|----------|----------|----------|----------|
|        |       | mg/l  | mg/l     | mg/l     | mg/l      | mg/l     | mg/l     | mg/l     | mg/l     | mg/l     | mg/l     |
| BIW    | rep ! | 0.012 | < -0.099 | < -0.093 | 6.811     | < -0.098 | < -0.175 | < -0.143 | < -0.040 | < -0.264 | < -0.222 |
| BIK    | rep ! | 0.019 | < -0.115 | < -0.090 | > 161.920 | < -0.117 | < -0.123 | < -0.124 | < -0.040 | < -0.264 | < -0.023 |

System  
Info Flow

Figure S-4(c): Results of bismuth analysis in ICP-OES analysis.
